# How many cues are sexy ? Evolution of mate preference towards multiple traits in sympatric species

Ludovic Maisonneuve, Charline Smadi, Violaine Llaurens

October 26, 2022

## Abstract

2 While the impact of mate preference on adaptation and speciation has been extensively studied, the  
3 evolutionary factors determining which and how many traits are targeted by mate choice are largely  
4 unknown. In sympatric species, trait distribution is shaped by similar selective pressure, promoting  
5 similar adaptive traits in the different species. When preference targets such adaptive traits, the  
6 similarity between species induce heterospecific matings and costs for the choosy partners. The  
7 evolution of preference for different traits thus likely depends on the ecological interactions between  
8 species. Using a mathematical model, we thus study the evolution of preference towards two evolving  
9 traits shared by sympatric species and we investigate how selective regimes on traits, opportunity  
10 costs and sensory trade-off shape the evolution of preference for multiple traits. As expected, the  
11 evolution of multiple traits preference is favored when females have access to a large number of  
12 mates and when there is limited sensory trade-off. More surprisingly, opportunity costs promote  
13 preference based on adaptive traits, rather than on traits relevant for species recognition. Since  
14 adaptation reduces trait variability in males, the evolution of preferences based on adaptive traits  
15 hardly suffers from opportunity costs. Our model thus highlights that the evolution of preferences  
16 for different traits in sympatric species depends on within-species mating opportunities but also on  
17 the niche overlap between species, tuning the heterospecific interactions.

## 18 Introduction

19 The evolution of mate preference plays a major role in the diversification of traits and species in the  
20 wild. Yet, little is known on the evolutionary factors determining the traits preferentially targeted  
21 by preferences, and especially the number of different cues used during mate choice.  
22 Preferences are based on traits displayed by the parents, but their evolution usually depends on the  
23 indirect fitness benefit in the offspring (Neff and Pitcher, 2005). The fitness of the offspring depends  
24 not only on the intraspecific competition but also on the ecological interactions with sympatric  
25 species. When poorly-divergent species occur in sympatry, mate preferences targeting certain traits  
26 can be promoted because of the reduced fitness in the hybrids (Merrill et al., 2012), but also because  
27 of the reduction in costly sexual interactions with heterospecifics (Gröning and Hochkirch, 2008).  
28 The evolution of preferences may therefore strongly depend on the selection regimes acting on the  
29 targeted traits within species, but also on the distribution of these traits in other species living in  
30 sympatry. Such multifarious selection acting on the different traits displayed by males may then

32 favor the evolution of female preferences targeting several traits. Using multiple cues may indeed  
33 improve some components of the fitness in the offspring and/or enhance recognition of conspecific  
34 males (Candolin, 2003).

35 Multiple traits preference may then be promoted when targeting traits associated with different  
36 components of the indirect fitness benefit (*e.g.* (Doucet and Montgomerie, 2003; Girard et al.,  
37 2015; Dale and Slagsvold, 1996)). Theoretical modeling show that preference towards multiple  
38 traits providing different indirect fitness benefit can evolve (Iwasa and Pomiankowski, 1994). The  
39 evolution of preference towards multiple non-adaptive cues can occur, when these cues provide  
40 greater reproductive success in the sons (*sexy sons hypothesis*) (Pomiankowski and Iwasa, 1993),  
41 suggesting that sexual selection can also promote the evolution of preference for multiple traits.  
42 Furthermore, selection promoting species recognition also promotes the evolution of preference for  
43 multiple traits that differentiate closely related species (Hohenlohe and Arnold, 2010; Vortman  
44 et al., 2013; Patten et al., 2004). While several sexual and natural selection have been suggested  
45 to favor the evolution of multiple traits preference, such evolution is likely to crucially depend  
46 on trait variations and covariation within and among sympatric species. By contrast with classical  
47 'magic' traits (Servedio et al., 2011), similar traits may be promoted by natural selection in different  
48 sympatric species (*e.g.* in mimetic species, Boussens-Dumon and Llaurens (2021)), indirect fitness  
49 benefit may then induce selection on preference conflicting with species recognition (*e.g.* (Gumm and  
50 Gabor, 2005; Higgin and Blows, 2007)). For example, in the spadefoot toad, preference for mating  
51 call increases the number of eggs fertilized in choosy females but leads to reproductive interference,  
52 because of the similarity of call between sympatric species (Pfennig, 2000). Preferences targeting  
53 multiple traits may then allow to improve both offspring fitness through the transmission of adapted  
54 alleles and species recognition. For example, in field crickets of the genus *Teleogryllus*, female targets  
55 both (1) CHCs, providing fitness benefits to their offspring (Berson and Simmons, 2019), and (2)  
56 male calling song (Hill et al., 1972) that differentiate sympatric species (Moran et al., 2020).

57 While preference based on multiple traits may be promoted by natural and sexual selection,  
58 several constraints might limit the number of traits targeted by preference. Preferences are gener-  
59 ally associated with fixed cost generated by mate searching, and these costs might be increased  
60 when preference targets multiple traits. Theoretical studies indeed show that the joint fixed costs  
61 of preference based on different trait indeed promotes preference based on single trait providing the  
62 greatest benefit (Schluter and Price, 1993), especially when the joint fixed costs quickly increases  
63 with the strength of preference for each trait (Pomiankowski and Iwasa, 1993; Iwasa and Pomi-  
64 ankowski, 1994). The evolution of preference for multiple traits may also be limited by the number  
65 of available partners displaying the preferred combination of traits. Opportunity costs associated  
66 with female rejection in choosy females may then increase when the number of targeted traits grows.

67 The evolution of multiple traits preference may also be limited by the complex cognitive processes  
68 involved, explaining the low number of traits used in mate choice in some clades (Candolin, 2003).  
69 Multiple traits-based mate choice may thus preferentially evolve in species where multiple sensory  
70 systems allow such cognitive integration. Evolutionary trade-off are often thought to limit the  
71 evolution of multiple sensory system: the development of sensory systems is frequently associated  
72 with the regression of others (Barton et al., 1995; Nummela et al., 2013). Moreover, physical  
73 constraints may generate sensory trade-offs: for example, visual system model of the surfperch  
74 reveals trade-off in the performance between luminance and chromatic detection, because of the  
75 limited numbers of the different types of cones in the eyes (Cummings, 2004). Neural integration  
76 of multiple information may also be limited, generating trade-offs in the use of multiple traits in  
77 decision. In the swordtail fish *Xiphophorus pygmaeus*, females express preference for a visual and

an olfactory traits when there are exposed to the variation of only one trait within potential mate.  
78 However, when both traits vary within potential mates, females do not express preference (Crapon  
de Caprona and Ryan, 1990), suggesting that sensory trade-off limits the use of multiple traits in  
80 preference.

These contradictory developmental and ecological factors call for a general framework deter-  
82 mining the evolution of preferences towards different traits shared between sympatric species, that  
may be either neutral or shaped by natural and sexual selection. Here, we thus use mathematical  
84 modeling to investigate the evolution of preference based on multiple traits. We study the evolution  
of preference towards two evolving traits ( $T_1$  and  $T_2$ ) shared by two sympatric species ( $A$  and  $B$ )  
86 aiming at identifying how selection regimes acting on the targeted traits, as well as reproductive  
interference between species favor preference targeting a single *vs.* multiple traits.

## 88 Method

### Modelling the evolution of female preference targeting different traits

90 We consider two closely-related species ( $A$  &  $B$ ) living in sympatry, and assume that individuals  
from both species display two main traits controlled by a single haploid locus (loci  $T_1$  and  $T_2$   
92 respectively, with two possible alleles 0 or 1). We fix the genotypic distribution in species  $B$  and  
we study the evolution of traits and preference on those traits in the focal species species  $A$ .

94 Only females express mate preference towards the traits displayed by males, and their preference  
depends on their own phenotype (following the matching rule described in Kopp et al. (2018)): we  
96 assume assortative preference whereby preferentially mate with males displaying traits similar to  
their own traits (Figure 1). Female assortative preference can target either traits (1 and 2) displayed  
98 by the males. A preference modifier locus  $M$  controls the relative level of attention of females toward  
trait 1 *vs.* trait 2 during their choice expressed by males (referred to as the preference direction  $\gamma$ ).  
100 We assume that only two alleles can occur at locus  $M$  with different values of  $\gamma$  modulating the  
level of attention on either traits. The set of different loci is given by  $\mathcal{L} = \{T_1, T_2, M\}$  and each  
102 genotype is a vector in  $\mathcal{G} = \{0, 1\}^3$ . We study the invasion of the mutant allele 1 associated with  
the value  $\gamma_m$  in the species  $A$ , where the allele 0, associated with the value  $\gamma_{wt}$ , was initially fixed.

104 We assumed that females can encounter and have sexual interactions with heterospecifics. Het-  
erospecific sexual interactions lead to fitness costs but do not produce any viable offspring. The  
106 evolutionary fate of the mutant at locus  $M$  in species  $A$  may thus depend on (1) reproductive  
interference promoting preferences that enhance species recognition and (2) the selection regime  
108 acting on traits  $T_1$  and  $T_2$ , enhancing the offspring survival. We assume an infinite population and  
we track down the frequency of each genotype across generations in species  $A$ . We assume that a  
110 generation is composed of three steps: (1) natural selection, (2) reproduction and (3) mutation, as  
detailed below.  
112

### Selection regime acting on the displayed traits

114 We assume that the traits  $T_1$  and  $T_2$  displayed by the individuals can modify their survival. We  
define  $f_i$  and  $f'_i$  as the frequencies of genotype  $i \in \{1, 2\}$  in the focal species before and after a step of  
116 natural selection acting on survival, respectively. The resulting frequency after selection,  $f'_i$  is then

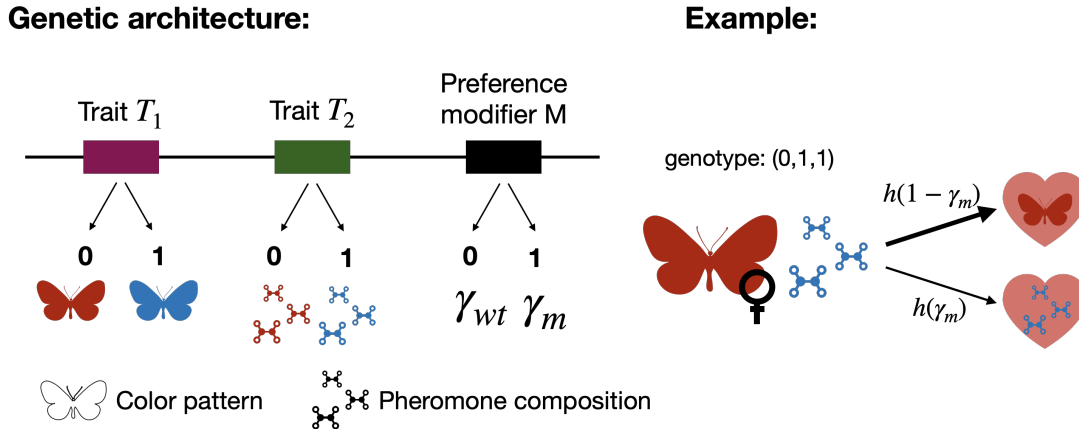

Figure 1: **Genetic architecture underlying trait and preference in species A.** As an illustrative example, here we show trait 1 as wing coloration and the trait 2 as a pheromonal composition. See also an illustration of the phenotype and behavior of a female of genotype vector (1, 0, 1). We note  $\gamma$  as the parameter controlling the preference direction, and  $h$  as the function describing the cognitive trade-off regulating the amount of attention paid to both traits

given by

$$f'_i = \frac{w_i}{\bar{w}} f_i, \quad (1)$$

118 where  $w_i$  is the fitness component due to natural selection of an individual of genotype  $i$ , while  $\bar{w}$  is the average fitness component due to natural selection averaged.

$$\bar{w} = \sum_{i \in \mathcal{G}} w_i f_i, \quad (2)$$

120 where  $\mathcal{G}$  is the set of all genotypes.

122 We note  $s_1$  and  $s_2$  the selective advantages associated with allele 1 at locus  $T_1$  and  $T_2$ , respectively. When natural selection favors individuals with allele 0 at locus  $T_i$ ,  $s_i$  is negative for  $i \in \{1, 2\}$ .

124 The fitness component due to natural selection of an individual of genotype  $i$  is thus given by:

$$w_i = (1 + (T_1)_i s_1) (1 + (T_2)_i s_2), \quad (3)$$

where  $(T_j)_i$  is the value of trait  $T_j$  (0 or 1) of individuals of genotype  $i$  for  $j \in \{1, 2\}$ .

## 126 **Reproductive success depending on female preference on traits displayed by males**

128 Genotypic frequencies after reproduction in the focal species then depend on the contribution to the next generation of the different crosses between females and males of genotype  $j$  and  $k$  respectively, described by  $m_{j,k}$ , for all  $j$  and  $k$  in  $\mathcal{G}$ . We note  $\bar{m}$  the mean value of this contribution across all

130

mating pairs

$$\bar{m} = \sum_{j,k \in \mathcal{G}} f'_j f'_k m_{j,k}. \quad (4)$$

132 The frequency after reproduction of genotype  $i$  in species A is then given by

$$f''_i = \sum_{j,k \in \mathcal{G}} f'_j f'_k \frac{m_{j,k}}{\bar{m}} \beta(i, j, k), \quad (5)$$

134 where  $\beta(i, j, k)$  describes the segregation of alleles during reproduction and provides the probability that a mating between a female of genotype  $j$  and a male of genotype  $k$  produces an offspring of genotype  $i$ . We assume recombination between female's and male's haplotypes, then the offspring  
136 inherits randomly from one of the two recombined haplotypes.

The contribution to the next generation of a mating of a pair then depends on the female  
138 preference towards the traits displayed by males, controlled by loci  $T_1$  and  $T_2$ . Assortative preference is assumed and the relative attention given by a female of genotype  $j$  to trait 2 vs. trait 1 is controlled  
140 by the preference direction parameter  $\gamma_j$ , determined by the allele at locus  $M$ : allele 0 is associated with  $\gamma_{wt}$  and allele 1 is associated with the value  $\gamma_m$ . The attention provided on male trait in a  
142 female of genotype  $j$  is thus given by:

$$\gamma_j = (1 - (M)_j) \gamma_{wt} + (M)_j \gamma_m, \quad (6)$$

where  $(M)_j$  is the allele (0 or 1) at locus  $M$  in genotype  $j$ . We assume that the relative attentions to the two traits, controlled by the parameter  $\gamma$  are submitted to a cognitive trade-off described by the function  $h$ : attention on trait 1 and 2 are respectively given by  $h(1 - \gamma)$  and  $h(\gamma)$  with

$$\forall x \in [0, 1], h(x) = x^a \quad \text{and} \quad a \in [0, +\infty).$$

144  $h$  is a non-decreasing function, so that attention on one trait diminishes attention on the alternative one. Moreover,  $h(0) = 0$  and  $h(1) = 1$ , so that in the two extreme cases, female choice relies on a single trait. The parameter  $a$  tunes the shape of the trade-off function  $h$  (see Figure A1):

- 146 • when  $a = 1$ ,  $h$  is linear, leading to a **linear trade-off**, where the female attention on traits 1 (resp. 2) is proportional to  $1 - \gamma$  (resp.  $\gamma$ ) (see black curve in Figure A1).
- 148 • when  $a < 1$ ,  $h$  is concave, leading to a **weak trade-off** between attention towards the two male traits. Females can thus use both traits for mate choice (see blue curve in Figure A1).
- 150 • when  $a > 1$ ,  $h$  is convex leading to a **strong trade-off** in female attention between the two traits. Females focusing on one trait largely ignore the alternative trait, and intermediate  
152 values of  $\gamma$  lead to poor attention on both traits (see red curve in Figure A1).

154 Therefore, when a female of genotype  $j$  in species A encounters a male of genotype  $k$ , she accepts the male with probability

$$\phi(j, k) = \left(1 - \mathbb{1}_{(T_1)_j \neq (T_1)_k} \rho h(1 - \gamma_j)\right) \left(1 - \mathbb{1}_{(T_2)_j \neq (T_2)_k} \rho h(\gamma_j)\right), \quad (7)$$

156 where  $\mathbb{1}_{\{\cdot\}}$  is the indicator function that returns 1 if the condition in subscript is realized and 0 otherwise. The parameter  $\rho$  quantifies the strength of assortative female preference.

158 During an encounter between individuals from different sexes, the probability that a female of genotype  $j$  accepts a conspecific male is then given by (Otto et al., 2008):

$$T(j) = \sum_{k \in \mathcal{G}} \overbrace{\frac{N}{N + \tilde{N}} f'_k}^{\text{probability of encountering a conspecific male of genotype } k} \overbrace{\phi(j, k)}^{\text{probability of accepting a conspecific male of genotype } k}, \quad (8)$$

where  $N$  and  $\tilde{N}$  are the densities of species A and B respectively.

160 A female of genotype  $j$  may also accept an heterospecific male with probability

$$T_{RI}(j) = \sum_{k \in \mathcal{G}} \overbrace{\frac{\tilde{N}}{N + \tilde{N}} \tilde{f}_k}^{\text{probability of encountering an heterospecific male of genotype } k} \overbrace{c_{RI} \phi(j, k)}^{\text{probability of accepting an heterospecific male of genotype } k}, \quad (9)$$

162 where  $c_{RI} \in [0, 1]$  captures the investment of females in interspecific mating. This cost of reproductive interference incurred to the females can be reduced when female preference is also based on alternative traits differing between species, or when individuals from both species do not encounter frequently. We assume that heterospecific crosses never produce any viable offspring, and that a female engaged in such a mating cannot recover the associated fitness loss.

166 Knowing that a female of genotype  $j$  has mated with a conspecific male, the probability that this male is of genotype  $k$  is given by

$$\Phi(j, k) = \frac{\phi(j, k) f'_k}{\sum_{l \in \mathcal{G}} \phi(j, l) f'_l}. \quad (10)$$

168 If females only encountered one male, the proportion of crosses between a female of genotype  $j$  and a conspecific male of genotype  $k$  would be

$$\mathcal{P}^1(j, k) = f'_j T(j) \Phi(j, k). \quad (11)$$

However, we assume that females refusing a mating opportunity can encounter another male with probability  $1 - c$ . We interpret  $c$  as the cost of choosiness (similar to the coefficient  $c_r$ , referred to as relative cost of choosiness in (Otto et al., 2008)). The proportion of crosses between a female of genotype  $j$  and a conspecific male of genotype  $k$  is thus given by

$$\begin{aligned} \mathcal{P}(j, k) &= \sum_{n=0}^{+\infty} ((1 - T(j) - T_{RI}(j)) (1 - c))^n \mathcal{P}^1(j, k) \\ &= \frac{\mathcal{P}^1(j, k)}{c + (1 - c)(T(j) + T_{RI}(j))}, \end{aligned} \quad (12)$$

170 where  $((1 - T(j) - T_{RI}(j)) (1 - c))^n$  is the probability that a female of genotype  $j$  rejects the  $n$  males she first encounters and then encounters an  $(n + 1)$ -th male.

172 The contribution to the next generation of a mating between a female of genotype  $j$  and a male of genotype  $k$  is thus given by

$$m_{j,k} = \frac{T(j)}{c + (1 - c)(T(j) + T_{RI}(j))} \frac{\phi(j, k)}{\sum_l f'_l \phi(j, l)}. \quad (13)$$

## 174 Mutation

We assume that mutations can occur at loci  $T_1, T_2$  within offspring. We assume that with probability  $u_{0 \rightarrow 1}^{T_i}$  (resp.  $u_{1 \rightarrow 0}^{T_i}$ ) allele 0 (resp. 1) mutates into allele 1 (resp. 0) at locus  $T_i, i \in \{1, 2\}$ .

All variables and parameters used in the model are summed up in Table A1.

## 178 Model exploration

### 180 Using QLE analysis to determine the evolutionary stable preference direction

We perform a Quasi-Linkage Equilibrium (QLE) analysis allowing to estimate the change of allele frequency at each locus. QLE analysis assumes that selection is weak and that recombination is strong compared to selection. In line with this hypothesis, we assume that  $s_1, s_2, \rho, c_{RI}, c$  are of order  $\varepsilon$  with  $\varepsilon$  low and that the recombination rates are of order 1. We also assume that mutation rates are of order  $\varepsilon$ . The QLE analysis is performed using Wolfram Mathematica 12.0 and all the details of the analytical results are presented in Appendix A1.

The QLE analysis allows to numerically estimate the evolutionary stable value of  $\gamma$ . The mutant is introduced at frequency  $P_M^0$ . We assume that the mutations at locus  $M$  have a low effect *i.e.* the difference  $\gamma_{wt}$  and  $\gamma_m$  is small (but see Appendix 1 for mutations with high effect). We consider:

- Evolutionary stable  $\gamma$ : value of  $\gamma_{wt}$  preventing the invasion of any other mutation of small effect at locus  $M$ .
- Repulsor: value of  $\gamma_{wt}$  enabling the invasion of other mutations of small effect at locus  $M$ .

We assume that once a mutant increases in frequency after its introduction it replaces the wild type allele in the population. Then the preference direction  $\gamma$  in the population tends to one of the evolutionary stable value refer as equilibrium value  $\gamma^*$ .

In these QLE analyses, we generally assume that ancestral preference equally targets both traits ( $\gamma_0 = 1/2$ ). However, the evolutionary stable direction of preference  $\gamma^*$  may depend on the ancestral value  $\gamma_0$ , we thus study the dependence to ancestral preference direction assuming the three different selective regimes detailed below, and summarized our findings in the Appendix (see Figures A2, A5 and A7).

In all these three cases, we also study the effects of the shape of the trade-off function  $h$  (through the parameter  $a$ ) and of opportunity costs (through the parameter  $c$ ) on equilibrium preference direction.

## Selection regimes promoting the evolution of multiple trait preference

We applied the QLE analysis method described above to specifically investigate three main selective regimes and to test their respective effects on the evolution of multiple traits preference in females.

### 208 (a) Preference enhancing offspring fitness

First, we consider that both trait provide an indirect fitness benefit due to natural selection ( $s_1 > 0$  and  $s_2 > 0$ ). To explicitly investigate whether preference would be based on multiple traits or on

the trait providing the strongest indirect fitness benefit, we assume that natural selection acts more intensely on trait  $T_1$  than on  $T_2$  (*i.e.*  $s_1 > s_2$ ). We assume no cost generated by heterospecific interactions ( $c_{RI} = 0$ ), but still hypothesize complete inviability in the hybrids.

#### 214 (b) Preference enhancing species recognition

We then assume that heterospecific interactions generate costly reproductive interference between sympatric species ( $c_{RI} = 0.01$ ) and investigate how selection promoting reproductive isolation impacts the evolution of multiple traits preference. When assuming reproductive interference costs, the advantage gained from a choice based on given trait crucially depends on the phenotypic distribution of this trait in the two sympatric species. We then consider that in species A, because of mutations, trait value 1 is common at both traits with the frequency of trait value 1 higher at trait  $T_1$  than at trait  $T_2$  ( $u_{0 \rightarrow 1}^{T_1} = 0.003$ ,  $u_{1 \rightarrow 0}^{T_1} = 0.001$ ,  $u_{0 \rightarrow 1}^{T_2} = 0.002$  and  $u_{1 \rightarrow 0}^{T_2} = 0.001$ ). We also explored the impact of different phenotypic distributions in species B in the evolution of preferences in species A. We focus only on the impact of reproductive interference on the evolution of preference and therefore assume that neither trait  $T_1$  nor  $T_2$  are submitted to natural selection ( $s_1 = s_2 = 0$ ).

#### (c) Preference enhancing both offspring fitness and species recognition

Finally, we test whether multiple trait preference can be promoted when one trait is submitted to a natural selection in both sympatric species, therefore also promoting preference towards an alternative trait neutral from selection, that may enhance species recognition. We then assume a natural selection regime promoting the same trait value 1 at  $T_1$  in both species. We thus assume that natural selection favors trait values 1 ( $s_1 > 0$ ) in species A and that trait value 1 is fixed ( $\tilde{P}_{T_1} = 1$ ) in species B. We then assume costs generated by reproductive interference ( $c_{RI} > 0$ ), so that preferences based on  $T_1$  are likely be costly. We then assume that both species are easily distinguishable based on trait  $T_2$ . We thus assume that the frequency of allele 0 at trait  $T_2$ , is higher in species A, whereas allele 1 is more common in species B ( $\tilde{P}_{T_1} = 0.6$ ). We investigate several strengths of natural selection favoring allele 1 at trait  $T_1$  ( $s_1$ ), as well as several strengths of reproductive interference ( $c_{RI}$ ). Because the proportion of maladapted trait value 0 at  $T_1$  increases the advantage of choosing adapted trait value 1, we investigate the effect of different mutation rates at locus  $T_1$ , assuming a symmetrical mutation rate ( $u_{0 \rightarrow 1}^{T_1} = u_{1 \rightarrow 0}^{T_1}$ ).

### Scripts availability

Scripts are available online at [github.com/Ludovic-Maisonneuve/evolution\\_of\\_multiple\\_traits\\_preference](https://github.com/Ludovic-Maisonneuve/evolution_of_multiple_traits_preference).

## 240 Results

We investigate the evolution of multiple traits preference in females by studying the invasion of a mutant at a modifier locus  $M$ , determining the attention paid to either traits ( $T_1$  and  $T_2$ ) displayed in males. We applied a QLE approach to determine the equilibrium level of attention paid to either traits  $\gamma^*$ , depending on the shape  $a$  of the cognitive trade-off limiting the attention on both traits simultaneously (see methods).



## 246 Which traits indicate 'good genes' ?

We first assume no costly heterospecific interaction and test the effect of natural selection acting on both traits ( $T_1$  and  $T_2$ ) on the evolution of female preference. Female preference towards the two traits can be promoted because of the positive effects generated on the fitness of their offspring when they carry the adapted alleles. Furthermore, preference may also be promoted by sexual selection, because females have an advantage to produce 'sexy offspring' (see Equation (A10)). By contrast with previous model (Pomiankowski and Iwasa, 1993), our model show that sexual selection alone can not promotes drive the evolution of multiple traits preference (see Appendix A2).

When assuming natural selection on the traits ( $s_1 > 0$  and  $s_2 > 0$ ), our model does predict the evolution of multiple trait preference. Assuming that ancestral preference equally target both traits ( $\gamma^0 = 1/2$ ), the fitness benefit gained by the offspring displaying adapted alleles of females carrying a mutant allele at the preference at the modifier locus  $M$  promotes the evolution of multiple preference. To specifically study the evolution of preference towards several traits in this 'good genes' hypothesis, we consider that natural selection acts more intensely on  $T_1$  ( $s_1 > s_2$ ), and determine the condition favouring the evolution of preference on both traits. Assuming a weak cognitive trade-off (low  $a$ ) and opportunity costs (low  $c$ ), the evolutionary stable preference is based on both traits, with more attention on trait  $T_1$  under stronger selection (see hatched area in Figure 2 (a)). This preference leads to the production of offspring with adapted alleles at both traits. However, stronger cognitive trade-off and opportunity costs prevent the evolution of such multiple traits preference (Figure 2 (a)). Interestingly, linear trade-off ( $\log(a) = 0$ ) leads to preference uniquely based on the trait under stronger selection (Figure 2 (a)). A weaker trade-off than linear trade-off is thus a necessary condition for the evolution of multiple traits preference, when both traits are under natural selection.

When assuming a strong trade-off, the evolution of preference also tightly depends on the ancestral preference value ( $\gamma^0$ ) (Figure A2). When the preference initially targets the trait  $T_2$  ( $\gamma^0 \simeq 1$ ), the evolution of female preference favours more attention towards the mildly selected trait  $T_2$  (see Figure A3). This is probably due to the strong sexual selection initially promoting preference on  $T_2$ : when trait  $T_2$  is ancestrally targeted by preference, it provides an indirect fitness benefit due to the production of 'sexy son'. This sexual selection promoting preference targeting  $T_2$  conflicts with the natural selection, promoting preference targeting  $T_1$ . Moreover, when assuming a strong cognitive trade-off, preference based on both traits leads to poor attention towards both traits, thus creating a fitness valley limiting the switch of female attention from one trait toward the alternative ones. When female choice is ancestrally mainly based on trait  $T_2$ , therefore creating positive sexual selection favouring preference on  $T_2$ , the positive selection on  $T_1$  is not powerful enough to cross this fitness valley, and the evolution towards attention to the trait  $T_1$  is not observed. However, the cross of this fitness valley is facilitated when mutations have a larger effect size (see figure A4).

## 282 Which traits participate to reinforcement ?

We then investigate whether reinforcement of species barriers promoted by reproductive interference may promote the evolution of multiple traits preference. We assume costly reproductive interference ( $c_{RI} = 0.01$ ), and that both traits are not under natural selection ( $s_1 = s_2 = 0$ ). We assume that trait value 1 is common at both traits in species A, whereas trait value 0 is common at both traits in species B, so that both traits are relevant cues for species recognition. Similarly to the natural selection regime explored above (hypothesis (a)), we assumed a higher frequency of trait value 1 in trait  $T_1$  than at trait  $T_2$ , making  $T_1$  the best cue for species recognition. Similarly to the results

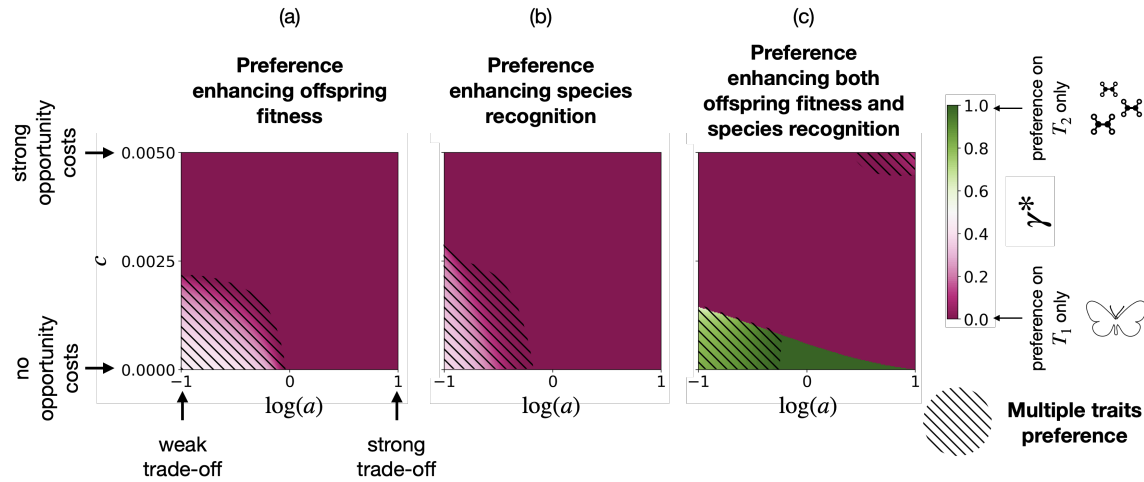

**Figure 2: Evolution of female preferences, depending on three different selection regime.** The three plot investigates the effect of the cognitive trade-off function  $a$  and on cost of choosiness  $c$  on the equilibrium preference direction  $\gamma^*$ , for these 3 selective regimes. Hatched area indicates parameter combinations where multiple traits preference is observed at equilibrium ( $0 < \gamma^* < 1$ ). In species A, mutation and natural selection promotes trait value 1 at both traits ( $u_{0 \rightarrow 1}^{T_1} = 0.003$ ,  $u_{1 \rightarrow 0}^{T_1} = 0.001$ ,  $u_{0 \rightarrow 1}^{T_2} = 0.002$ ,  $u_{1 \rightarrow 0}^{T_2} = 0.001$ ,  $s_1 \geq 0$  and  $s_2 \geq 0$ ). We assume: (a) that both traits are under natural selection, with stronger selection on  $T_1$  than  $T_2$  ( $s_1 = 0.02$  and  $s_2 = 0.01$ ), (b) reproductive interference ( $c_{RI} = 0.05$ ) and that both trait may allow species recognition ( $\tilde{P}_{T_1} = \tilde{P}_{T_2} = 0$ ) (c) reproductive interference ( $c_{RI} = 0.05$ ), that trait  $T_1$  is under natural selection ( $s_1 = 0.02$ ) and that trait  $T_2$  may allow species recognition ( $\tilde{P}_{T_2} = 0.4$ ). Ancestrally preference equally targets both trait ( $\gamma_0 = 1/2$ ). By default we assume:  $P_{T_1}^0 = P_{T_2}^0 = 0.5$ ,  $P_M^0 = 0.01$ ,  $\tilde{P}_{T_1} = \tilde{P}_{T_2} = 1$ ,  $s_1 = s_2 = 0$ ,  $\rho = 0.01$ ,  $c_{RI} = 0$ ,  $N = \tilde{N} = 10$ . Note that the dependence of these results to the ancestral value  $\gamma_0$  is detailed in Figure A2.

290 obtained for hypothesis (a), multiple traits preference can evolve when the cognitive trade-off and  
 291 the opportunity costs are weak (Figure 2 (b)).

292 When assuming that heterospecific mating attempts may happen, the advantage gained from a  
 293 choice based on a given trait crucially depends on the phenotypic distribution of this trait in the  
 294 two sympatric species (see Equation (A6)). We then explored different phenotypic distributions in  
 295 species B, to investigate the effect of heterospecific mating on the evolution of the targeting of the  
 296 trait by females.

297 When species differ in the distribution of both traits preferences based on both traits then  
 298 become advantageous, leading to multiple traits preference (Figure 3). Else single trait preference  
 299 based on the trait that differentiate the most conspecific and heterospecific evolve. The parameter  
 300 space where females choose only on trait  $T_1$  is wider because this trait is more likely to differentiate  
 species as the frequency of trait value 1 is higher at trait  $T_1$  than at trait  $T_2$ .

### Preference enhancing species recognition

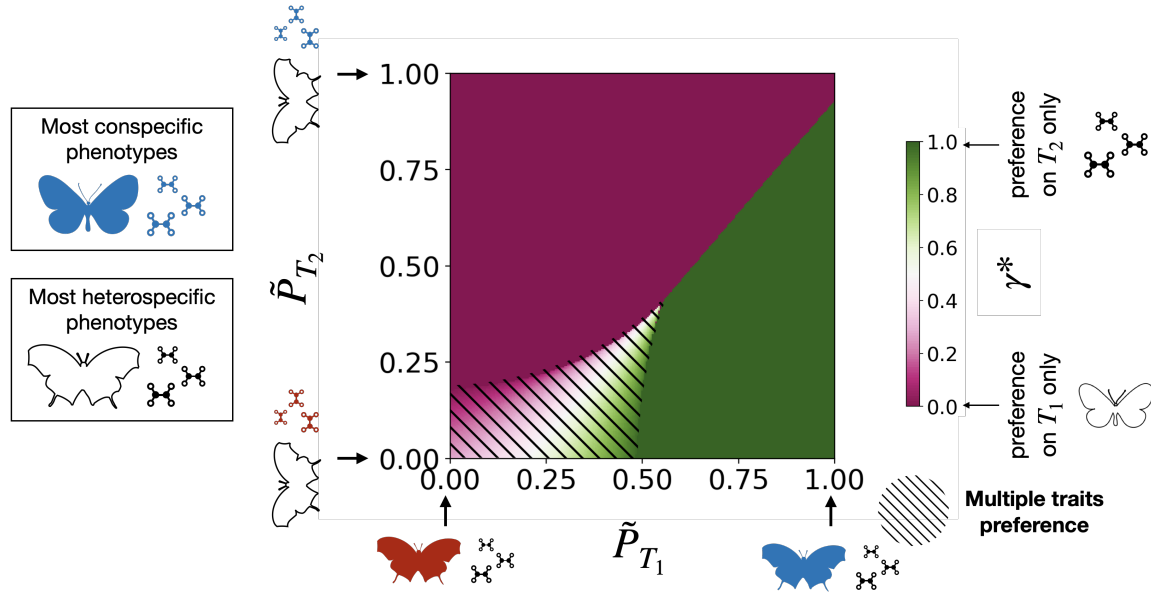

Figure 3: **Equilibrium preference direction  $\gamma^*$  depending on the phenotypic distributions in species B ( $\tilde{P}_{T_1}$  and  $\tilde{P}_{T_2}$ ).** Hatched area indicates parameter combinations where multiple traits preference is observed at equilibrium ( $0 < \gamma^* < 1$ ). In species A, mutations promote trait value 1 at both traits ( $u_{0 \rightarrow 1}^{T_1} = 0.003$ ,  $u_{1 \rightarrow 0}^{T_1} = 0.001$ ,  $u_{0 \rightarrow 1}^{T_2} = 0.002$ ,  $u_{1 \rightarrow 0}^{T_2} = 0.001$ ). Ancestrally, preference equally targets both trait ( $\gamma_0 = 1/2$ ). We assume:  $P_{T_1}^0 = P_{T_2}^0 = 0.5$ ,  $P_M^0 = 0.01$ ,  $s_1 = s_2 = 0$ ,  $\rho = 0.01$ ,  $c = 0.001$ ,  $c_{RI} = 0.05$ ,  $a = e^{-1}$ ,  $N = \tilde{N} = 10$ . Note that the dependence of these results to the ancestral value  $\gamma_0$  is detailed in Figure A5.

### 302 Connecting 'good genes' and reinforcement theory

304 We explore the evolution of multiple traits preference that may allow producing fitted offspring,  
 306 while enhancing species recognition. We thus assume that the trait  $T_1$  is under natural selection,  
 leading to resemblance to species B (*e.g.* modeling sympatric species where the same trait allow  
 308 local adaptation in both species): we assume that natural selection favors trait values 1 ( $s_1 > 0$ )  
 in species A and that trait value 1 is fixed ( $\tilde{P}_{T_1} = 1$ ) in species B. In contrast, the trait  $T_2$  is not  
 310 submitted to natural selection, but is a relevant cue for species recognition: we assume that the  
 frequency of allele 1 is higher in species A, whereas allele 0 is more common in species B ( $\tilde{P}_{T_1} = 0.4$ ).

312 Weak trade-off and opportunity costs allow the evolution of multiple traits preference mainly  
 based on the neutral trait allowing species recognition ( $T_2$ ) (Figure 2 (c)). Opportunity costs  
 314 then promote preference based on trait under natural selection  $T_1$  (Figure 2 (c)). Indeed natural  
 selection acting on trait  $T_1$  reduces phenotypic diversity in the focal species and therefore also  
 reduces opportunity costs associated with preference based on the trait  $T_1$  in this species (see  
 Equation (A9)). Thus high mutation rate at trait  $T_1$ , leading to high phenotypic diversity, limits

316 preference based on trait under natural selection  $T_1$  (Figure A6). Increasing values of the cognitive  
318 trade-off promotes choice on the the trait  $T_2$  (Figure 2 (c)), because it provides a better fitness  
320 benefit (Note that this fitness benefit depends on our assumptions on the relative levels of strength  
322 of natural selection on  $T_1$  and of reproductive interference, see below). However, when opportunity  
324 costs increases, an increase of trade-off then leads preference to target only targeting the trait  
under natural selection ( $T_1$ ) (Figure 2 (c)). Trade-off promotes preference mainly based on one  
trait, however preference mainly based on neutral trait leads to stronger opportunity cost because  
of the higher phenotypic diversity in the neutral trait ( $T_2$ ), while natural selection on the trait  $T_1$   
strongly limit intra-specific diversity. Then strong trade-off, in interaction with opportunity costs,  
promotes preference targeting only the naturally selected trait  $T_1$ .

326 Very strong trade-off and opportunity costs surprisingly promote multiple traits preference (Fig-  
ure 2 (c)). Due to the important trade-off, this preference leads to poor attention on both traits,  
328 resulting in almost random mating, that limits opportunity costs.

We then investigate the impact of the strength of natural selection favoring allele 1 at trait  $T_1$   
( $s_1$ ) and the strength of reproductive interference ( $c_{RI}$ ) on the evolutionary stable preference direc-  
330 tion. As expected natural selection (resp. reproductive interference) promotes preference based on  
332 the naturally selected trait  $T_1$  (reps. the trait allowing species recognition  $T_2$ ) (Figure 4). Without  
opportunity costs ( $c = 0$ ), natural selection promotes multiple traits preference, whereas reproduc-  
334 tive interference leads to preference targeting  $T_2$  only. Because we assume complete inviability in  
the hybrids, with strong reproductive interference, females prioritize species recognition.

336 Opportunity costs ( $c = 0.001$ ) allow only the evolution of multiple traits preferences that mainly  
target the neutral trait. Multiple traits preferences mainly targeting the naturally selected trait  
338 would reduce the phenotypic diversity at trait  $T_1$ , *via* sexual selection. Thus such preferences would,  
by reducing opportunity costs, strongly advantage preference targeting  $T_1$  and then promotes the  
340 single trait preference targeting the trait  $T_1$ .

342 Altogether our results show how natural and sexual selection, sensory trade-off and ancestral  
preference shape the evolution of female preference toward different traits displayed by males.

## Discussion

344 Mate preferences have been extensively studied in the light of the 'good genes' hypothesis (Puur-  
tinen et al., 2009) or in the context on reinforcement (Servedio and Noor, 2003). By jointly considering (1)  
346 the selection regimes acting on the targeted traits within species, as well as (2) interactions with  
other species living in sympatry, our theoretical study provides a general framework reconciling  
348 these research fields.

We thus focused on natural selection regime shared between sympatric species promoting species  
350 similarity, increasing risks of reproductive interference. Our approach thus drastically differ from  
classical studies on reinforcement, focusing on 'magic traits', submitted to disruptive selection  
352 between species (Servedio et al., 2011). Because 'magic traits' are honest signals of both local  
adaptation and of species identity, there is no antagonistic selection regimes that may promote the  
354 evolution of multiple trait preferences in this case.

Our results show that opportunity costs play a key role in the evolution of multiple trait pref-  
356 erence. In our model, the opportunity costs promotes preference based on naturally selected traits  
rather than on traits allowing species recognition. As natural selection erodes phenotypic diversity,  
358 preference based on traits allowing species recognition leads to stronger opportunity cost, promoting  
preference targeting the naturally selected traits. However, the low level of variations are usually

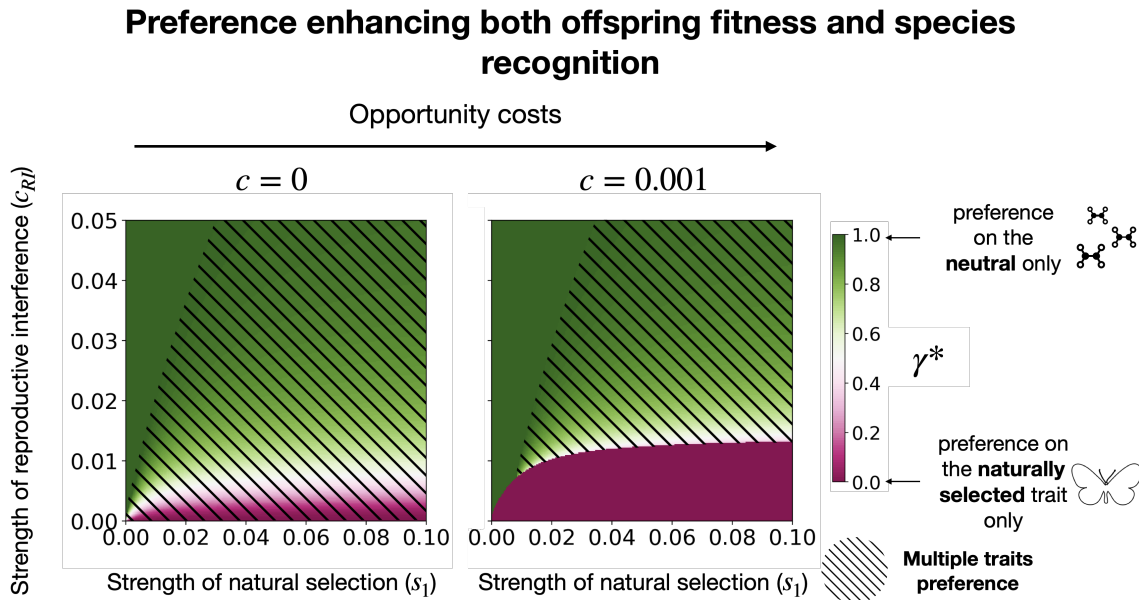

Figure 4: **Evolution of preference direction  $\gamma^*$ , depending on the strength natural selection acting on trait  $T_1$  ( $s_1$ ) and the strength of reproductive interference ( $c_{RI}$ ), for different cost of choosiness ( $c$ ).** We assume (a)  $c = 0$  and (b)  $c = 0.001$ . Hatched area indicates parameter combinations where multiple traits preference is observed at equilibrium ( $0 < \gamma^* < 1$ ). Ancestrally, preference equally targets both trait ( $\gamma_0 = 1/2$ ). We assume:  $P_{T_1}^0 = P_{T_2}^0 = 0.5$ ,  $P_M^0 = 0.01$ ,  $\tilde{P}_{T_1} = 1$ ,  $\tilde{P}_{T_2} = 0.4$ ,  $s_2 = 0$ ,  $\rho = 0.01$ ,  $a = e^{-1}$ ,  $N = \tilde{N} = 10$ ,  $u_{0 \rightarrow 1}^{T_1} = 0.003$ ,  $u_{1 \rightarrow 0}^{T_1} = 0.001$ ,  $u_{0 \rightarrow 1}^{T_2} = 0.002$ ,  $u_{1 \rightarrow 0}^{T_2} = 0.001$ . Note that the dependence to  $\gamma_0$  is detailed in Figure A7.

360 observed in locally adapted traits prevent positive selection on these traits: because there is hardly  
 362 any 'maladapted' variants, there is no longer selection to avoid it. Our model highlights that female  
 364 preference may then preferentially target traits that differ from other species (Figure A6). For example in *Heliconius*  
 366 butterflies, wing pattern is under selection because predators associated locally abundant wing patterns with unpalatability, leading to the fixation of a local wing pattern within and between species. In some of these mimetic species, female preference targets chemical cues differentiating sympatric species. (González-Rojas et al., 2020).

368 In our model, species recognition traits are neutral. However constraints act on trait display, depending notably on the detectability of the displayed trait. We assume that choosers perceived all trait values equally. However, increased trait detectability may induce costs: for example, the conspicuousness of a trait display increase parasitism and predation risks (Zuk and Kolluru, 1998). Increasing costs of sexual trait conspicuousness may theoretically promotes the light display of several traits (Johnstone, 1995), therefore promoting preference multiple towards multiple cryptic traits.

374 Our results highlight how indirect fitness benefit and/or reproductive interference can promotes

376 female preference for multiple traits. Our model highlights that the evolution of multiple traits oc-  
378 cur only when the cognitive trade-off is weak. The evolution of multiple trait preference is therefore  
probably more likely to emergence in species where complex neural processes do occur. Never-  
380 theless, several alternative decision mechanisms may reduce this cognitive trade-off. For example  
sequential/hierarchical mate preference, whereby targeted traits are process in a hierarchical order,  
382 efficiently produce decision, even considering a large number of traits (Gigerenzer et al., 1999).  
Sequential mate preference is frequently observed (*e.g.* (Shine and Mason, 2001; Eddy et al., 2012;  
384 Gray, 2022)) and may allow the evolution of multiple traits preference. Sequential mate choice  
may emerge because some trait are visible at long-distance (such as color or calls), whereas others  
are perceived only at short distances (such as oviposition site guarded by males or male-emitted  
386 pheromones) (*e.g.* (Candolin and Reynolds, 2001; López and Martín, 2001; Mérot et al., 2015)).

The distance at which different traits are perceived may play a key role in reproductive isolation  
(Moran et al., 2020). Females deceived by short-distance trait of the heterospecific males may have  
388 already spent time and energy or may need to deploy substantial efforts to avoid heterospecific mat-  
ing. Therefore, females may still suffer from increased costs associated to reproductive interference,  
390 even if they eventually manage to avoid mating with heterospecific males (Gröning and Hochkirch,  
2008). Therefore reproductive interfere may promote preference targeting long-distance trait that  
392 may reduce efficiently heterospecific interactions.

Reproductive isolation between species also depends on the niche of individuals of both species.  
394 Mating occurs between individuals sharing the same niche leading to niche-based assortative mat-  
ing. Niche segregation may play a key role in the evolution of reproductive isolation. In two teafrogs  
396 species, differing by there mating call (Park et al., 2013), different spatial and temporal segrega-  
tion in calling and resting places during breeding period increases reproductive isolation (Borzée  
398 et al., 2016). As well as sequential mate preference, niche segregation may efficiently participate to  
reproductive isolation without generating trade-off with preference for other traits. Niche segrega-  
400 tion limit opportunity costs because there is no need to sample a species recognition trait, whereas  
sequential mate preference increase sampling time.

402 Our study shows how natural and sexual selection may promote multiple traits preference in  
sympatric species. Our study highlights the importance of understanding trade-off between prefer-  
404 ence targeting different trait whereas opportunity costs to understand what trait are targeted by  
preference.

## 406 Conclusion

We study the direction of preference towards two evolving traits shared by sympatric species. We  
408 consider selection regimes acting on traits that increase similarity with heterospecific individuals,  
leading to costly sexual interactions. We study how selective regimes on traits, heterospecific in-  
410 teractions, opportunity costs and sensory trade-off shape the evolution of preference for multiple  
traits. Weak opportunity costs and sensory trade-off allow the evolution of multiple traits preference  
412 enhancing offspring fitness and/or species recognition. Our main result is that that opportunity  
costs promote preference based on adaptive traits rather than on traits relevant for species recog-  
414 nition. Because adaptation reduces the number of trait values, preference based on adaptive traits  
hardly suffer from opportunity costs. Then opportunity costs may limit multiple traits preference  
416 enhancing both offspring fitness and species recognition.

## References

- 418 Barton, R. A., Purvis, A., and Harvey, P. H. (1995). Evolutionary radiation of visual and olfactory  
420 brain systems in primates, bats and insectivores. Philosophical Transactions of the Royal Society  
of London. Series B: Biological Sciences, 348(1326):381–392.
- Berson, J. D. and Simmons, L. W. (2019). Female cuticular hydrocarbons can signal indirect  
422 fecundity benefits in an insect. Evolution, 73(5):982–989.
- Borzée, A., Kim, J. Y., Da Cunha, M. A. M., Lee, D., Sin, E., Oh, S., Yi, Y., and Jang, Y. (2016).  
424 Temporal and spatial differentiation in microhabitat use: Implications for reproductive isolation  
and ecological niche specification. Integrative Zoology, 11(5):375–387.
- 426 BousSENS-DUMON, G. and LLAURENS, V. (2021). Sex, competition and mimicry: an eco-evolutionary  
428 model reveals how ecological interactions shape the evolution of phenotypes in sympatry. Oikos,  
in press.
- Candolin, U. (2003). The use of multiple cues in mate choice. Biological Reviews, 78(4):575–595.
- 430 Candolin, U. and Reynolds, J. D. (2001). Sexual signaling in the European bitterling: females learn  
the truth by direct inspection of the resource. Behavioral Ecology, 12(4):407–411.
- 432 Crapon de Caprona, M.-D. and Ryan, M. J. (1990). Conspecific mate recognition in sword-  
434 tails, *Xiphophorus nigrensis* and *X. pygmaeus* (poeciliidae): olfactory and visual cues. Animal  
Behaviour, 39(2):290–296.
- Cummings, M. E. (2004). Modelling divergence in luminance and chromatic detection performance  
436 across measured divergence in surfperch (embiotocidae) habitats. Vision Research, 44(11):1127–  
1145.
- 438 Dale, S. and Slagsvold, T. (1996). Mate choice on multiple cues, decision rules and sampling  
strategies in female pied flycatchers. Behaviour, 133(11/12):903–944.
- 440 Doucet, S. M. and Montgomerie, R. (2003). Multiple sexual ornaments in satin bowerbirds: ultravi-  
442 olet plumage and bowers signal different aspects of male quality. Behavioral Ecology, 14(4):503–  
509.
- Eddy, S. L., Kiemnec-Tyburczy, K. M., Uyeda, J. C., and Houck, L. D. (2012). The influence of  
444 sequential male courtship behaviors on courtship success and duration in a terrestrial salamander,  
*Plethodon shermani*. Ethology, 118(12):1240–1250.
- 446 Gigerenzer, G., Todd, P., and Gerd Gigerenzer, A. R. (1999). Simple Heuristics that Make Us Smart. Evo-  
lution and cognition. Oxford University Press.
- 448 Girard, M. B., Elias, D. O., and Kasumovic, M. M. (2015). Female preference for multi-modal  
450 courtship: multiple signals are important for male mating success in peacock spiders. Proceedings  
of the Royal Society B: Biological Sciences, 282(1820):20152222.
- González-Rojas, M. F., Darragh, K., Robles, J., Linares, M., Schulz, S., McMillan, W. O., Jiggins,  
452 C. D., Pardo-Diaz, C., and Salazar, C. (2020). Chemical signals act as the main reproductive  
454 barrier between sister and mimetic *Heliconius* butterflies. Proceedings of the Royal Society B:  
Biological Sciences, 287(1926):20200587.

- 456 Gray, D. A. (2022). Sexual selection and 'species recognition'; revisited: serial processing and order-of-operations in mate choice. Proceedings of the Royal Society B: Biological Sciences, 289(1971):20212687.
- 458 Gröning, J. and Hochkirch, A. (2008). Reproductive interference between animal species. The Quarterly Review of Biology, 83(3):257–282. PMID: 18792662.
- 460 Gumm, J. M. and Gabor, C. R. (2005). Asexuals looking for sex: conflict between species and mate-quality recognition in sailfin mollies (*poecilia latipinna*). Behavioral Ecology and Sociobiology, 462 58(6):558–565.
- 464 Higgin, M. and Blows, M. (2007). Are traits that experience reinforcement also under sexual selection? The American Naturalist, 170(3):409–420. PMID: 17879191.
- 466 Hill, K. G., Loftus-Hills, J. J., and Gartside, D. F. (1972). Pre-mating isolation between the Australian field crickets *telegryllus commodus* and *t. oceanicus* (orthoptera : Gryllidae). Australian Journal of Zoology, 20(2):153–163.
- 468 Hohenlohe, P. A. and Arnold, S. J. (2010). Dimensionality of mate choice, sexual isolation, and speciation. Proceedings of the National Academy of Sciences, 107(38):16583–16588.
- 470 Iwasa, Y. and Pomiankowski, A. (1994). The evolution of mate preferences for multiple sexual ornaments. Evolution, 48(3):853–867.
- 472 Johnstone, R. A. (1995). Honest advertisement of multiple qualities using multiple signals. Journal of Theoretical Biology, 177(1):87–94.
- 474 Kopp, M., Servedio, M. R., Mendelson, T. C., Safran, R. J., Rodríguez, R. L., Hauber, M. E., Scordato, E. C., Symes, L. B., Balakrishnan, C. N., Zonana, D. M., and van Doorn, G. S. (2018). Mechanisms of assortative mating in speciation with gene flow: Connecting theory and empirical research. The American Naturalist, 191(1):1–20. PMID: 29244561.
- 476 478 López, P. and Martín, J. (2001). Pheromonal recognition of females takes precedence over the chromatic cue in male Iberian wall lizards *Podarcis hispanica*. Ethology, 107(10):901–912.
- 480 Merrill, R. M., Wallbank, R. W. R., Bull, V., Salazar, P. C. A., Mallet, J., Stevens, M., and Jiggins, C. D. (2012). Disruptive ecological selection on a mating cue. Proceedings of the Royal Society B: Biological Sciences, 279(1749):4907–4913.
- 482 484 Moran, P. A., Hunt, J., Mitchell, C., Ritchie, M. G., and Bailey, N. W. (2020). Sexual selection and population divergence iii: Interspecific and intraspecific variation in mating signals. Journal of Evolutionary Biology, 33(7):990–1005.
- 486 Mérot, C., Frérot, B., Leppik, E., and Joron, M. (2015). Beyond magic traits: Multimodal mating cues in *Heliconius* butterflies. Evolution, 69(11):2891–2904.
- 488 Neff, B. D. and Pitcher, T. E. (2005). Genetic quality and sexual selection: an integrated framework for good genes and compatible genes. Molecular Ecology, 14(1):19–38.
- 490 Nummela, S., Pihlström, H., Puolamäki, K., Fortelius, M., Hemilä, S., and Reuter, T. (2013). Exploring the mammalian sensory space: co-operations and trade-offs among senses. Journal of Comparative Physiology A, 199(12):1077–1092.
- 492



- 494 Otto, S. P., Servedio, M. R., and Nuismer, S. L. (2008). Frequency-dependent selection and the evolution of assortative mating. Genetics, 179(4):2091–2112.
- 496 Park, S., Jeong, G., and Jang, Y. (2013). No reproductive character displacement in male advertisement signals of *Hyla japonica* in relation to the sympatric *H. suweonensis*. Behavioral Ecology and Sociobiology, 67(8):1345–1355. Communicated by M. Gibbons.
- 498 Patten, M. A., Rotenberry, J. T., and Zuk, M. (2004). Habitat selection, acoustic adaptation, and the evolution of reproductive isolation. Evolution, 58(10):2144–2155.
- 500 Pfennig, K. S. (2000). Female spadefoot toads compromise on mate quality to ensure conspecific matings. Behavioral Ecology, 11(2):220–227.
- 502 Pomiankowski, A. and Iwasa, Y. (1993). Evolution of multiple sexual preferences by Fisher's runaway process of sexual selection. Proceedings of the Royal Society of London. Series B: Biological Sciences, 253(1337):173–181.
- 504 Puurtinen, M., Ketola, T., and Kotiaho, J. (2009). The good-genes and compatible-genes benefits of mate choice. The American Naturalist, 174(5):741–752. PMID: 19772439.
- 508 Schluter, D. and Price, T. (1993). Honesty, perception and population divergence in sexually selected traits. Proceedings of the Royal Society of London. Series B: Biological Sciences, 253(1336):117–122.
- 510 Servedio, M. R., Doorn, G. S. V., Kopp, M., Frame, A. M., and Nosil, P. (2011). Magic traits in speciation: 'magic' but not rare? Trends in Ecology & Evolution, 26(8):389–397.
- 512 Servedio, M. R. and Noor, M. A. (2003). The role of reinforcement in speciation: Theory and data. Annual Review of Ecology, Evolution, and Systematics, 34(1):339–364.
- 514 Shine, R. and Mason, R. T. (2001). Courting male garter snakes (*Thamnophis sirtalis parietalis*) use multiple cues to identify potential mates. Behavioral Ecology and Sociobiology, 49(6):465–473.
- 516 Vortman, Y., Lotem, A., Dor, R., Lovette, I., and Safran, R. J. (2013). Multiple sexual signals and behavioral reproductive isolation in a diverging population. The American Naturalist, 182(4):514–523. PMID: 24021403.
- 520 Zuk, M. and Kolluru, G. R. (1998). Exploitation of sexual signals by predators and parasitoids. The Quarterly Review of Biology, 73(4):415–438.

## Appendix

### 522 A1 QLE analysis

#### Evolution of mating traits under natural and sexual selection

First, we explored the relative effects of natural and sexual selections on the evolution of traits in species A. Following the QLE approach, the change of allele 1 frequency at  $T_i$ , for  $i \in \{1, 2\}$ , after one generation in this species is given by:

$$\Delta P_{T_i} = G_{T_i} \overbrace{\left( s_i + \bar{\rho}_i \left( P_{T_i} - \frac{1}{2} \right) \right)}^{\text{natural and sexual selections}} + \overbrace{(1 - P_{T_i})u_{0 \rightarrow 1}^{T_i} - P_{T_i}u_{1 \rightarrow 0}^{T_i}}^{\text{action of mutations}} + O(\varepsilon^2), \quad (\text{A1})$$

524 where  $G_I$  is the genetic diversity at locus  $I \in \{T_1, T_2, M\}$  given by

$$G_I = P_I(1 - P_I), \quad (\text{A2})$$

and  $\bar{\rho}_1$  and  $\bar{\rho}_2$  are the average strengths of preference on traits  $T_1$  and  $T_2$  respectively in the population

$$\bar{\rho}_1 = \rho((1 - P_M)h(1 - \gamma_{wt}) + P_M h(1 - \gamma_m)), \quad (\text{A3})$$

$$\bar{\rho}_2 = \rho((1 - P_M)h(\gamma_{wt}) + P_M h(\gamma_m)). \quad (\text{A4})$$

While the action of natural selection simply depends on the advantage of trait value 1 due to  
 526 natural selection  $s_i$ , the effect of sexual selection is modulated by the average strength of preference  
 on trait  $T_1$  in the population  $\bar{\rho}_i$ . Sexual selection promotes (resp. disfavors) allele 1 when this  
 528 allele is the most common (resp. rare) in the population *i.e.* when  $P_{T_1} > 1/2$  (resp.  $P_{T_1} < 1/2$ )  
 generating a positive frequency-dependent selection. The assortative mate preference assumed  
 530 implies that most females display the most common trait and seek for males exhibiting this trait.  
 The most frequently displayed trait allele is therefore associated with an enhanced reproductive  
 532 success. An enhanced attention of females towards one out of the two male traits then results in a  
 reduction of the polymorphism for this trait more targeted by sexual selection.

#### 534 Evolution of mutants modifying the trait used by females for mate choice

The traits targeted by preference in species A can be shared with species B. This is even more likely  
 536 when these traits are submitted to similar natural selection pressures in both sympatric species,  
 enhancing a similar frequencies of traits. The natural selection exerted on the traits in both species  
 538 might therefore strongly affect the risk of heterospecific mate choice. We thus investigate the  
 evolution of the focus of female preference on either trait in species A, depending on the natural  
 540 selection exerted on either trait. We thus study the invasion of a mutant at locus  $M$  associated  
 with the value  $\gamma_m$ , differing from the value  $\gamma_{wt}$  associated with the ancestral allele. Under the  
 542 QLE approximation, the allele frequency variation at the preference locus can be divided into  
 three terms, denoted  $\Delta^{\text{dir-RI}}$ ,  $\Delta^{\text{dir-c}}$  and  $\Delta^{\text{ind}}$   $P_M$ , reflecting the effect of direct selection due to  
 544 reproductive interference and opportunity costs and indirect selection, on the change of the mutant  
 frequency  $\Delta P_M$  respectively.

$$\Delta P_M = \Delta^{\text{dir-RI}} P_M + \Delta^{\text{dir-c}} P_M + \Delta^{\text{ind}} P_M + O(\varepsilon^3). \quad (\text{A5})$$

546 **Reproductive interference promotes preference targeting the trait leading to strongest species recognition.**

The effect of reproductive interference on the change of mutant frequency is given by

$$\Delta^{\text{dir-RI}} P_M = G_M c_{RI} \frac{\tilde{N}}{N} \left( \delta\rho_1 \left( P_{T_1} - \frac{1}{2} \right) \left( P_{T_1} - \tilde{P}_{T_1} \right) + \delta\rho_2 \left( P_{T_2} - \frac{1}{2} \right) \left( P_{T_2} - \tilde{P}_{T_2} \right) \right), \quad (\text{A6})$$

where  $\tilde{P}_{T_1}$  and  $\tilde{P}_{T_2}$  are the frequencies of allele 1 at loci  $T_1$  and  $T_2$  respectively in heterospecific.  $\delta\rho_1$  and  $\delta\rho_2$  quantify the effect of the mutant allele on the preference on trait  $T_1$  and  $T_2$  respectively compared to the wild type allele

$$\delta\rho_1 = \rho (h(1 - \gamma_m) - h(1 - \gamma_{wt})), \quad (\text{A7})$$

$$\delta\rho_2 = \rho (h(\gamma_m) - h(\gamma_{wt})). \quad (\text{A8})$$

548 For instance when  $\delta\rho_2 > 0$  the mutant allele leads to more attention on trait  $T_2$  than the wild type allele. Note that  $h$  is an increasing function:  $\delta\rho_1$  and  $\delta\rho_2$  thus have opposite signs, *i.e.* when  
550 mutant allele increases female attention on one trait, it also decreases female attention on the other trait.

552 As expected, the effect of reproductive interference mainly depends on density ratio between species A and B,  $\tilde{N}/N$ : the probability that a female encounters an heterospecific male increases  
554 with  $\tilde{N}/N$ . Selection caused by reproductive interference also increases with the strength of preference  $\rho$ , because the stronger preferences are, the more females with preference leading to heterospecific rejection avoid heterospecific mates. This leads to a greater fitness difference between females  
556 with different preferences intensifying selection, due to reproductive interference.

558 Reproductive interference promotes preference on the trait allowing more accurate species recognition. Selection due to reproductive interference depends then on relative phenotypic frequencies  
560 in both species. Preference on a trait leads to increased intraspecific matings than expected under random mating, when the targeted trait is more common within the species A than within species  
562 B. The higher the difference in trait frequencies between species, the stronger species recognition is. However, natural selection favors resemblance on the selected trait between species A and B  
564 and thus leads to similar cost of reproductive interference than expected under random mating. By contrast, when traits are neutral, phenotypic distributions within the two species can be more  
566 different. Preference based on trait may either increase or decrease species recognition compared to random mating. Females are more attracted by heterospecifics when the most common preferred  
568 trait value is more common within heterospecifics. Therefore in some cases focusing on neutral traits may be worst for species recognition than naturally selected trait.

570 **Sympatry with other species intensifies opportunity costs**

Preference allows to reject heterospecific males but also leads to the rejection of conspecific males. After rejecting a male, a female has a probability  $c$  of not encountering another male leading to an opportunity cost. The effect of these opportunity costs on change of mutant frequency is given by

$$\Delta^{\text{dir-c}} P_M = -G_M c \frac{N + \tilde{N}}{N} (\delta\rho_1 G_{T_1} + \delta\rho_2 G_{T_2}). \quad (\text{A9})$$

The fate of a mutant depends on trait polymorphism and on its effect on the attention towards either male traits. Limited polymorphism in a male trait indeed reduces opportunity costs, associated with female choice based on that trait. Because we assume assortative mating, most females have and prefer the most abundant trait value leading to low opportunity cost. Since natural selection reduces polymorphism at the male adaptive trait, opportunity costs may promote female preference towards trait under stronger natural selection.

Surprisingly, selection due to opportunity costs increases with the proportion of heterospecifics. When a female rejects a conspecific male, she has to wait to encounter another conspecific male to produce offspring and avoid opportunity cost. However, the more there are heterospecifics, the more females will encounter heterospecific males before encountering a conspecific male, making the rejection of a conspecific more dramatic when conspecific males are rare. The effect of opportunity costs is thus proportional to the average number of males that females will encounter until she encounters a conspecific  $(N + \tilde{N})/N$ .

#### Indirect selection promotes preference on the trait providing the strongest indirect fitness benefit

The mutant at locus  $M$  does not only directly change the fitness because it modifies reproductive interference and opportunity costs, but also because it can be associated with different alleles at the traits loci  $T_1$  and  $T_2$  in the offspring, leading to contrasted indirect fitness benefits. Within offspring, the mutant allele at locus  $M$  becomes associated with the preferred alleles at trait  $T_1$  or  $T_2$ . Therefore selection on the traits  $T_1$  and  $T_2$  can indirectly affect the frequency of the mutant at locus  $M$ . The term describing the effect of indirect selection on mutant alleles at locus  $M$  is given by

$$\Delta^{\text{ind}} P_M = \underbrace{D_{T_1 M}^*}_{\text{genetic association between } T_1 \text{ and } M} \underbrace{\left( s_1 + \bar{\rho}_1 \left( P_{T_1} - \frac{1}{2} \right) \right)}_{\text{direct selection on } T_1} + \underbrace{D_{T_2 M}^*}_{\text{genetic association between } T_2 \text{ and } M} \underbrace{\left( s_2 + \bar{\rho}_2 \left( P_{T_2} - \frac{1}{2} \right) \right)}_{\text{direct selection on } T_2}, \quad (\text{A10})$$

where  $D_{T_1 M}^*$  (resp.  $D_{T_2 M}^*$ ) is the genetic association between the mutant allele at locus  $M$  and allele 1 at locus  $T_1$  (resp.  $T_2$ ), see (A11). When the mutant is associated with a trait value, direct selection on this trait indirectly affects change of mutant frequency.

The genetic association between the mutant at locus  $M$  and the trait  $T_i$ , for  $i \in \{1, 2\}$ , is given by

$$D_{T_i M}^* = G_{T_i} G_M \delta \rho_i \left( P_{T_i} - \frac{1}{2} \right) + O(\varepsilon^2). \quad (\text{A11})$$

When the mutant leads to more attention on  $T_i$  ( $\delta \rho_i > 0$ ), the mutant becomes associated with the most common allele at  $T_i$ . Because of assortative female preference, when one trait value is common, females mostly prefer this trait. This generates a tighter association between preference and trait alleles. Accordingly, when the mutant leads to less attention on  $T_i$  ( $\delta \rho_i < 0$ ), it is associated with the rarest allele. As trait alleles promoted by natural selection are more common, indirect selection promotes preference towards the trait under stronger selection. This selection includes natural and

sexual selections, highlighting the importance of the ancestral value of  $\gamma$  in the population which  
596 determines the strength of sexual selection acting on each trait.

## A2 Preference enhancing offspring 'sexiness'

598 We consider the case where the indirect fitness benefit provided by each trait is exclusively due to  
production of 'sexy son'. We then assume no natural selection and no reproductive interference  
600 ( $s_1 = s_2 = c_{RI} = 0$ ). Because opportunity costs may depend on the distribution of trait values  
at each trait we assume that mutations promote a more balanced proportion of trait values on  $T_2$   
602 ( $u_{0 \rightarrow 1}^{T_2} = 0.002$  and  $u_{1 \rightarrow 0}^{T_2} = 0.001$ ) than on  $T_1$  ( $u_{0 \rightarrow 1}^{T_1} = 0.003$  and  $u_{1 \rightarrow 0}^{T_1} = 0.001$ ).

Without opportunity costs ( $c = 0$ ), multiple traits preference evolve only for very weak trade-  
604 off ( $\log(a) \simeq -1$ ) (Figure A2.1). With subsequent opportunity costs, the evolution of preference  
depends on the shape of the trade-off:

- 606 • With strong trade-off ( $\log(a) > 0$ ), the opportunity costs surprisingly promote preference  
based on both traits. This preference leads to poor attention on both traits, leading to  
608 an almost random mating that limits opportunity costs. This result is observed because  
we assume fixed strength of level preference ( $\rho$ ). Considering an evolving strength of level  
610 preference, the high opportunity costs would promote no preference ( $\rho = 0$ ).
- 612 • By contrast, with weak trade-off ( $\log(a) < 0$ ), opportunity costs favor attention only on trait  
 $T_1$ . Females with preference on both traits suffer from high opportunity costs, because they  
are likely to refuse a large number of males and may therefore have a decreased reproductive  
614 success. Females then choose on the trait with the lower phenotypic diversity limiting  
opportunity costs.

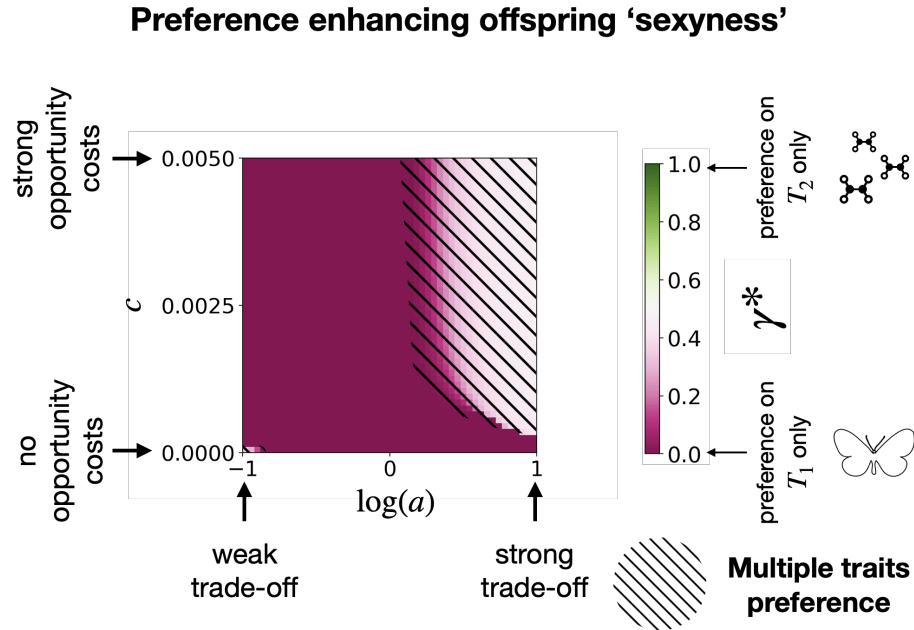

Figure A2.1: **Equilibrium preference direction  $\gamma^*$  depending on  $\log(a)$  where  $a$  tunes the shape of the trade-off function and on cost of choosiness ( $c$ ).** Hatched area indicates parameter combinations where multiple traits preference is observed at equilibrium ( $0 < \gamma^* < 1$ ). In species A mutations promotes higher phenotypic diversity at trait  $T_2$  ( $u_{0 \rightarrow 1}^{T_1} = 0.003$ ,  $u_{1 \rightarrow 0}^{T_1} = 0.001$ ,  $u_{0 \rightarrow 1}^{T_2} = 0.002$ ,  $u_{1 \rightarrow 0}^{T_2} = 0.001$ ). Ancestrally preference equally targets both trait ( $\gamma_0 = 1/2$ ). We assume:  $P_{T_1}^0 = P_{T_2}^0 = 0.5$ ,  $P_M^0 = 0.01$ ,  $\tilde{P}_{T_1} = \tilde{P}_{T_2} = 1$ ,  $s_1 = s_2 = 0$ ,  $\rho = 0.01$ ,  $c_{RI} = 0$ ,  $N = \tilde{N} = 10$ .

616 **A3 Table and Figures**

| Abbreviation                                  | Description                                                                                                                                                                                        |
|-----------------------------------------------|----------------------------------------------------------------------------------------------------------------------------------------------------------------------------------------------------|
| $\mathcal{L}$                                 | Set of different loci for the <i>matching rule</i> model: $\mathcal{L} = \{T_1, T_2, M\}$ and for the <i>preference/trait</i> model $\mathcal{L} = \{T_1, P_1, T_2, P_2, M\}$ .                    |
| $\mathcal{G}$                                 | Set of different genotypes for the <i>matching rule</i> model: $\mathcal{G} = \{0, 1\}^3$ and for the <i>preference/trait</i> model $\mathcal{G} = \{0, 1\}^5$ .                                   |
| $f_i/\tilde{f}_i$                             | Frequency of genotype $i$ in species A or B.                                                                                                                                                       |
| $P_I/\tilde{P}_I$                             | Frequency of allele 1 at locus $I$ , for $I \in \mathcal{L}$ , in species A or B.                                                                                                                  |
| $N/\tilde{N}$                                 | Density of species A/B.                                                                                                                                                                            |
| $G_I$                                         | Genetic diversity at locus $I$ in species A, $G_I = P_I(1 - P_I)$ for $I \in \mathcal{L}$ .                                                                                                        |
| $(I)_i$                                       | Allele at locus $I$ of the genotype $i$ for $(I, i) \in \mathcal{L} \times \mathcal{G}$ .                                                                                                          |
| $D_{\mathcal{I}}$                             | Genetic association between alleles at loci in $\mathcal{I}$ :<br>$D_{\mathcal{I}} = \sum_{i \in \mathcal{G}} f_i \prod_{I \in \mathcal{I}} (P_I - (I)_i)$ for $\mathcal{I} \subset \mathcal{L}$ . |
| $f'_i/f''_i/f'''_i$                           | Frequency of genotype $i$ in species a after natural selection/reproduction/mutation.                                                                                                              |
| $s_n$                                         | Selective advantage of allele 1 at locus $T_n$ , $n \in \{0, 1\}$ .                                                                                                                                |
| $\gamma_i$                                    | Preference direction.                                                                                                                                                                              |
| $h$                                           | Trade-off function determining the relative focus of females on either trait displayed by males.                                                                                                   |
| $a$                                           | Trade-off parameter tuning the shape of the function $h$                                                                                                                                           |
| $\rho$                                        | Strength of female preference.                                                                                                                                                                     |
| $c_{RI}$                                      | Strength of reproductive interference.                                                                                                                                                             |
| $c$                                           | Cost of choosiness.                                                                                                                                                                                |
| $u_{0 \rightarrow 1}^I/u_{1 \rightarrow 0}^I$ | Mutation rate of allele 0/1 towards 1/0 at locus $I \in \mathcal{L}$ .                                                                                                                             |

Table A1: Description of variables and parameters used in the model.

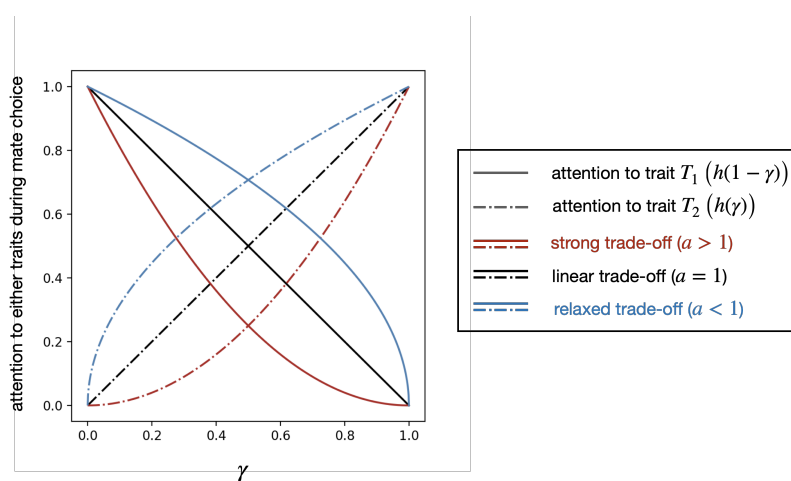

Figure A1: Attention paid by females to either traits displayed by males during assortative mate choice, depending on the preference direction parameter  $\gamma$  controlled by the locus  $M$ , for different shapes of the trade-off function  $h$ . Blue, red and black lines indicate concave, convex and linear trade-off functions respectively.



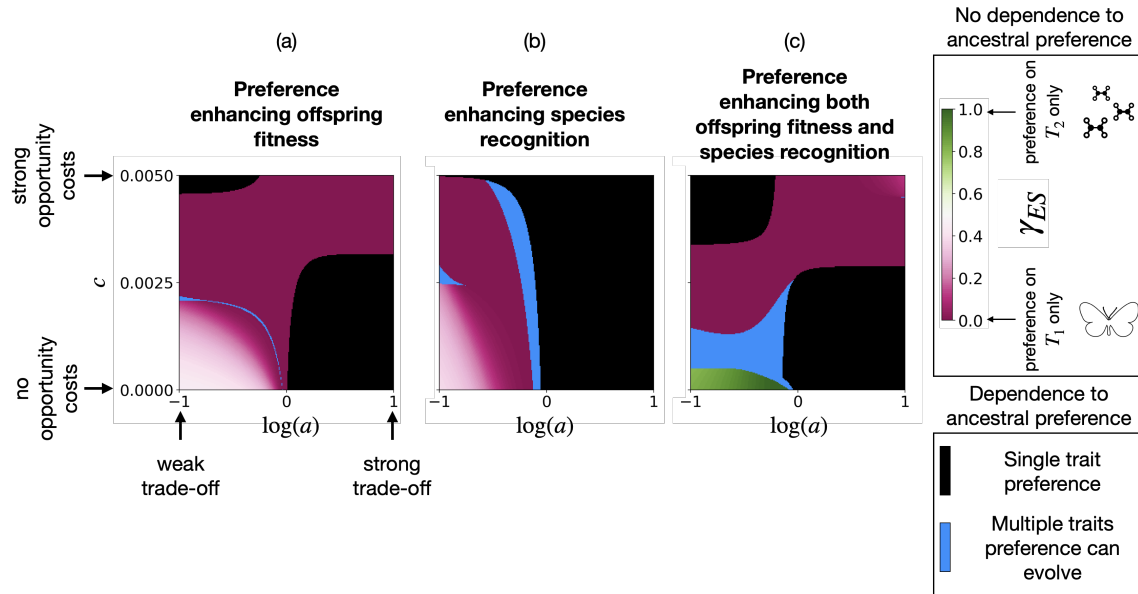

Figure A2: **Evolutionary stable preference, depending on three different selection regime.** The three plot investigates the effect of the cognitive trade-off function  $a$  and on cost of choosiness  $c$  on the evolutionary stable preference, for these 3 selective regimes. Shades of color indicates the unique value  $\gamma_{ES}$ . Black and blue area indicates parameter spaces with several values  $\gamma_{ES}$ . In black area only single trait preferences are evolutionary stable. In blue area at least one  $\gamma_{ES}$  value corresponds to multiple trait preference. In species A mutations and natural selection promotes trait value 1 at both traits in species A ( $u_{0 \rightarrow 1}^{T_1} = 0.003$ ,  $u_{1 \rightarrow 0}^{T_1} = 0.001$ ,  $u_{0 \rightarrow 1}^{T_2} = 0.002$ ,  $u_{1 \rightarrow 0}^{T_2} = 0.001$ ,  $s_1 \geq 0$  and  $s_2 \geq 0$ ). We assume: (a) that both traits are under natural selection ( $s_1 = 0.02$  and  $s_2 = 0.01$ ), (b) reproductive interference ( $c_{RI} = 0.05$ ) and that both trait may allow species recognition ( $\tilde{P}_{T_1} = \tilde{P}_{T_2} = 0$ ) (c) reproductive interference ( $c_{RI} = 0.05$ ), that trait  $T_1$  is under natural selection ( $s_1 = 0.02$ ) and that trait  $T_2$  allowing species recognition ( $\tilde{P}_{T_2} = 0.4$ ). By default we assume:  $P_{T_1}^0 = P_{T_2}^0 = 0.5$ ,  $P_M^0 = 0.01$ ,  $\tilde{P}_{T_1} = \tilde{P}_{T_2} = 1$ ,  $s_1 = s_2 = 0$ ,  $\rho = 0.01$ ,  $c_{RI} = 0$ ,  $N = \tilde{N} = 10$ .

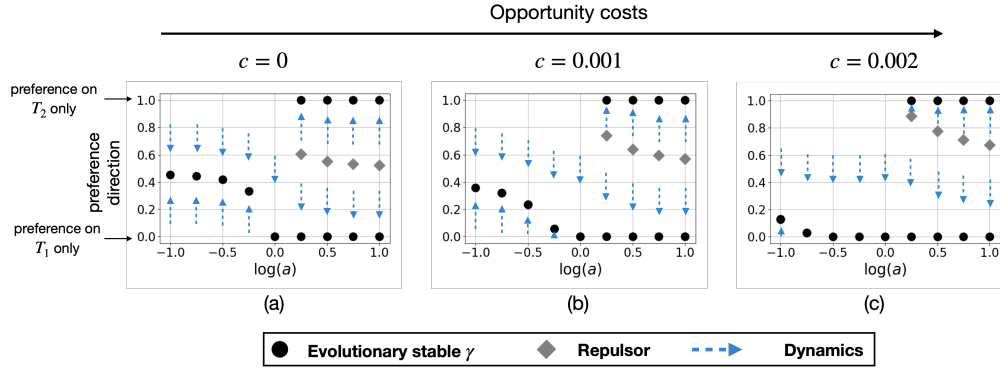

Figure A3: **Evolutionary stable value of  $\gamma$  depending on  $\log(a)$  where  $a$  tunes the shape of the trade-off function for different values of cost of choosiness ( $c$ ).** Black dots represent evolutionary stable  $\gamma$ , grey squares represent repulsors and blue arrows represent dynamics (see Method part). We assume (a)  $c = 0$ , (b)  $c = 0.001$  and (c)  $c = 0.002$ . We also assume:  $P_{T_1}^0 = P_{T_2}^0 = 0.5$ ,  $P_M^0 = 0.01$ ,  $\tilde{P}_{T_1} = 1 = \tilde{P}_{T_2} = 0$ ,  $s_1 = 0.02$ ,  $s_2 = 0.01$ ,  $\rho = 0.01$ ,  $c_{RI} = 0$ ,  $N = \tilde{N} = 10$ ,  $u_{0 \rightarrow 1}^{T_1} = 0.003$ ,  $u_{1 \rightarrow 0}^{T_1} = 0.001$ ,  $u_{0 \rightarrow 1}^{T_2} = 0.002$ ,  $u_{1 \rightarrow 0}^{T_2} = 0.001$ .

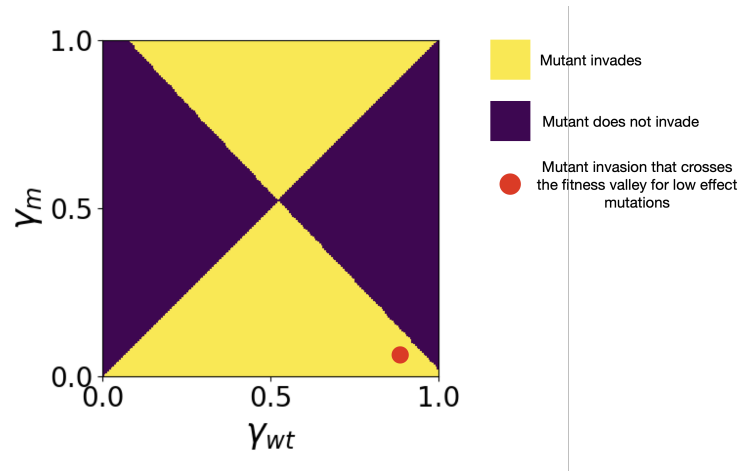

Figure A4: **Invasion graph.** Red dot shows the invasion of the mutant with high effect mutation. We assume:  $\log(a) = 1$ ,  $P_{T_1}^0 = P_{T_2}^0 = 0.5$ ,  $\tilde{P}_{T_1} = \tilde{P}_{T_2} = 1$ ,  $s_1 = 0.02$ ,  $s_2 = 0.01$ ,  $\rho = 0.01$ ,  $c = 0$ ,  $c_{RI} = 0$ ,  $N = \tilde{N} = 10$ ,  $u_{0 \rightarrow 1}^{T_1} = 0.003$ ,  $u_{1 \rightarrow 0}^{T_1} = 0.001$ ,  $u_{0 \rightarrow 1}^{T_2} = 0.002$ ,  $u_{1 \rightarrow 0}^{T_2} = 0.001$ .

## Preference enhancing species recognition

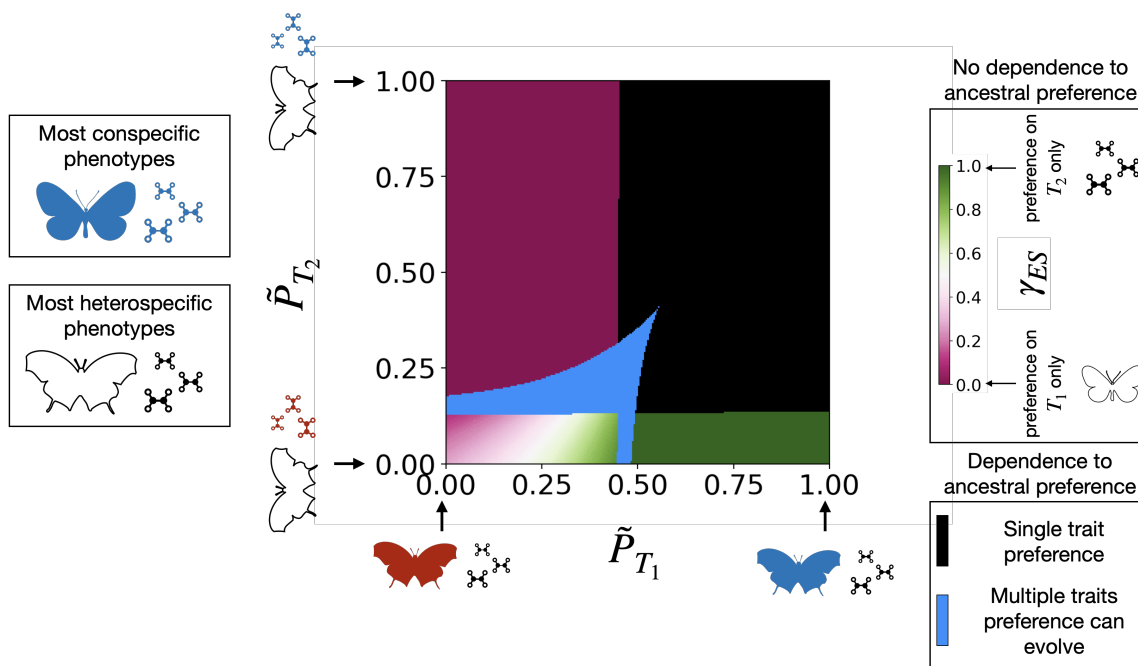

Figure A5: **Evolutionary stable preference direction  $\gamma_{ES}$  depending on the phenotypic distributions in species B ( $\tilde{P}_{T_1}$  and  $\tilde{P}_{T_2}$ ).** Shades of color indicates the unique value  $\gamma_{ES}$ . Black and blue area indicates parameter spaces with several values  $\gamma_{ES}$ . In black area only single trait preferences are evolutionary stable. In blue area at least one  $\gamma_{ES}$  value corresponds to multiple trait preference. In species A mutations promote trait value 1 at both traits in species A ( $u_{0 \rightarrow 1}^{T_1} = 0.003$ ,  $u_{1 \rightarrow 0}^{T_1} = 0.001$ ,  $u_{0 \rightarrow 1}^{T_2} = 0.002$ ,  $u_{1 \rightarrow 0}^{T_2} = 0.001$ ). We assume:  $P_{T_1}^0 = P_{T_2}^0 = 0.5$ ,  $P_M^0 = 0.01$ ,  $s_1 = s_2 = 0$ ,  $\rho = 0.01$ ,  $c = 0.001$ ,  $c_{RI} = 0.05$ ,  $a = e^{-1}$ ,  $N = \tilde{N} = 10$ .

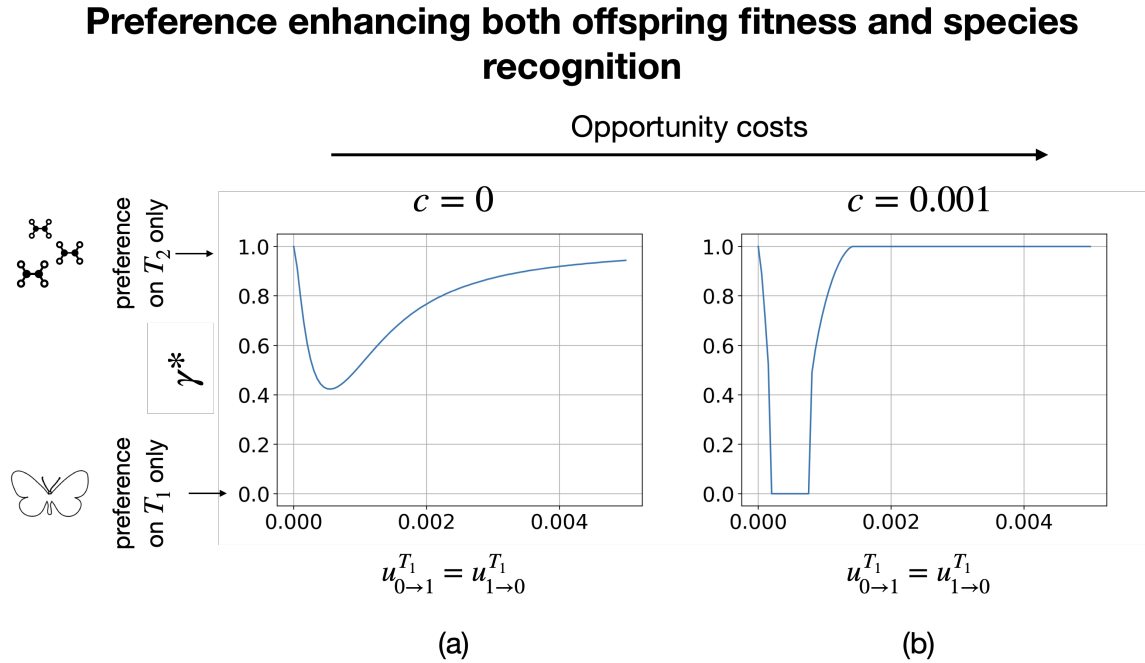

Figure A6: **Equilibrium preference direction  $\gamma^*$  depending on mutation rates at locus  $T_1$  ( $u_{0 \rightarrow 1}^{T_1} = u_{1 \rightarrow 0}^{T_1}$ ) for different cost of choosiness ( $c$ ).** We assume (a)  $c = 0$  and (b)  $c = 0.001$ . Ancestrally preference equally targets both trait ( $\gamma_0 = 1/2$ ). We assume:  $P_{T_1}^0 = P_{T_2}^0 = 0.5$ ,  $P_M^0 = 0.01$ ,  $\tilde{P}_{T_1} = \tilde{P}_{T_2} = 1$ ,  $s_1 = s_2 = 0$ ,  $\rho = 0.01$ ,  $a = e^{-1}$ ,  $c_{RI} = 0$ ,  $N = \tilde{N} = 10$ ,  $u_{0 \rightarrow 1}^{T_2} = 0.002$ ,  $u_{1 \rightarrow 0}^{T_2} = 0.001$ .

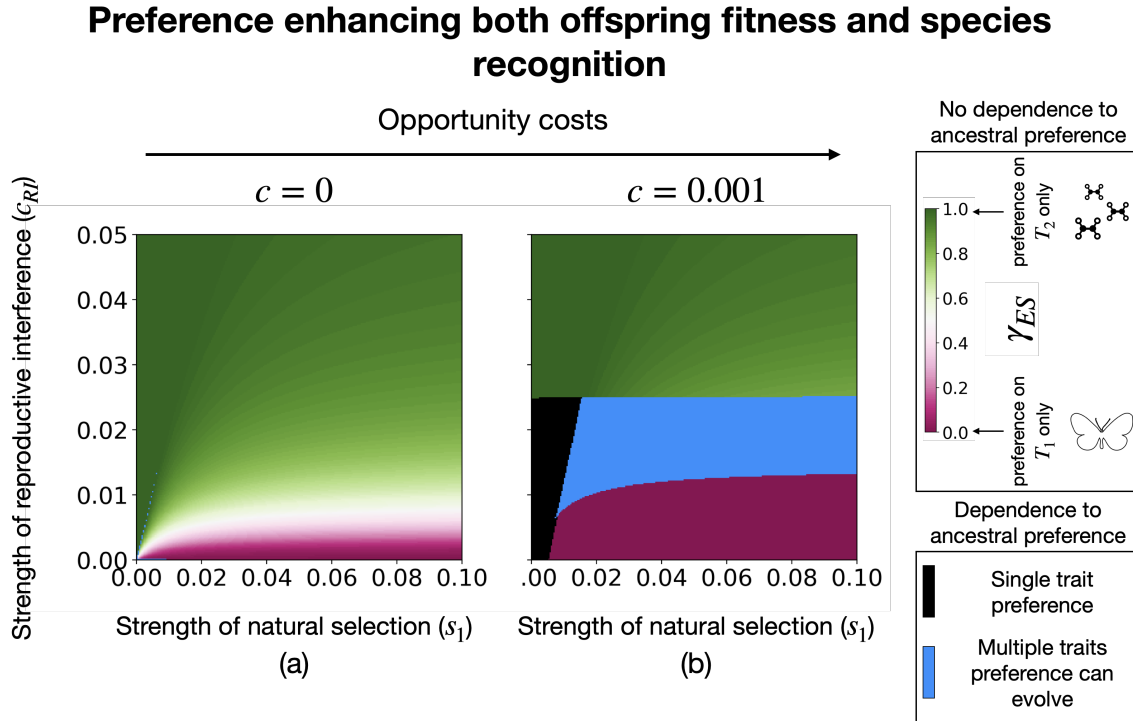

Figure A7: **Evolutionary stable preference direction  $\gamma_{ES}$  depending on natural selection acting on trait  $T_1$  ( $s_1$ ) and the strength of reproductive interference ( $c_{RI}$ ) for different cost of choosiness ( $c$ ).** We assume (a)  $c = 0$  and (b)  $c = 0.001$ . Shades of color indicates the unique value  $\gamma_{ES}$ . Black and blue area indicates parameter spaces with several values  $\gamma_{ES}$ . In black area only single trait preferences are evolutionary stable. In blue area at least one  $\gamma_{ES}$  value corresponds to multiple trait preference. We assume:  $P_{T_1}^0 = P_{T_2}^0 = 0.5$ ,  $P_M^0 = 0.01$ ,  $\bar{P}_{T_1} = 1$ ,  $\bar{P}_{T_2} = 0.4$ ,  $s_2 = 0$ ,  $\rho = 0.01$ ,  $a = e^{-1}$ ,  $N = \tilde{N} = 10$ ,  $u_{0 \rightarrow 1}^{T_1} = 0.003$ ,  $u_{1 \rightarrow 0}^{T_1} = 0.001$ ,  $u_{0 \rightarrow 1}^{T_2} = 0.002$ ,  $u_{1 \rightarrow 0}^{T_2} = 0.001$ .
